# Supplementary material for: Assessing Knowledge, Preventive Practices, and Depression among Chinese University Students in Korea and China during the COVID-19 Pandemic: An Online Cross-Sectional Study
Source: PubMed Central journal article supplement (PMC8067962; doi:10.3390/healthcare9040433), 2021-04-08
Supplement: healthcare-09-00433-s001.pdf [file healthcare-09-00433-s001.pdf]

# Study Questionnaire

Date of Survey (dd/mm/yyyy): \_\_\_\_\_

## Questionnaire on COVID-19

Thank you very much for your willingness to participate in a multinational study entitled “Immediate psychological responses and associated factors during the initial stage of the 2019 novel coronavirus (2019-nCoV) epidemic among the college students.” The entire survey will take about 20 minutes to complete. No personally identifiable information will be collected.

### Part 1

#### Part A: Demographics

1. Gender:       Male  Female
2. Age:      \_\_\_\_\_
3. Education attainment  
 University: Bachelor  
 University: Master or PhD
4. Residential area during the COVID-19 outbreak  
Please specify City (County) \_\_\_\_\_
5. Marital status  
 Single  
 Married
6. Employment status  
 Student,  
 Employed  
 Unemployed  
 Others
7. Parental status?  
 Not applicable  
 No children

- Has child 16 years or under
- Has child older than 16 years
- 8. Household size:
  - 1 person
  - 2 persons
  - 3-5 persons
  - 6 persons or more
- 9. Have you traveled outside of your residential country in the past 14 days?
  - No
  - Yes, please specify visited countries \_\_\_\_\_

**Part B: Symptoms and physical health status**

1. Symptoms of body discomfort in the past 14 days (please check all that apply)
  - Persistent fever (>38°C for at least 1 day)
  - Chills
  - Headaches
  - Myalgia
  - Cough
  - Difficulty breathing
  - Dizziness
  - Coryza
  - Sore throat
  - Persistent fever and cough or difficulty breathing
  - Nausea, vomiting, diarrhoea
2. Did you see a doctor in the clinic in the past 14 days?
  - No (skip to #6)
  - Yes
3. Were you admitted to the hospital in the past 14 days?
  - No
  - Yes
4. Were you tested for COVID-19 / 2019-novel coronavirus in the past 14 days?
  - No
  - Yes
5. Were you under quarantine by health authority in the past 14 days?
  - No
  - Yes
6. Please self-rate your current health status
  - Very good
  - Good

- Fair
  - Poor
  - Very poor
7. Do you have medical insurance from private sector?
- Yes
  - No
8. Do you suffer from a chronic illness diagnosed by physician?
- No
  - Yes, please specify \_\_\_\_\_
9. Do you have experiences self-isolation?
- Yes
  - No

**Part C: Contact history**

1. Have you directly or indirectly contacted patients suffering from COVID-19?
- No (skip to Part D)
  - Yes
  - [Don't know]
2. Extent of direct and indirect contact history of COVID-19 patients (please check all that apply)
- Close contact with a confirmed case
  - Indirect contact with a confirmed case (“contact of direct contact”)
  - Contact with a suspected case
  - Contact with infected materials
  - [Don't know]

**Part D: Knowledge and belief about COVID-19**

- |                                          |                       |                       |                       |
|------------------------------------------|-----------------------|-----------------------|-----------------------|
| 1. Does the COVID-19 transmit through... | Agree                 | Disagree              | Don't know            |
| a. Droplets                              | <input type="radio"/> | <input type="radio"/> | <input type="radio"/> |
| b. Contact via contaminated objects      | <input type="radio"/> | <input type="radio"/> | <input type="radio"/> |
| c. Airborne                              | <input type="radio"/> | <input type="radio"/> | <input type="radio"/> |

2. How satisfy you are with the amount of health information available about COVID-19?
- Very satisfied
  - Satisfied
  - Dissatisfied
  - Very dissatisfied

Don't know

|                                                   |                       |                         |
|---------------------------------------------------|-----------------------|-------------------------|
| 3. Have you heard of the following...             | Heard                 | No heard/<br>Don't know |
| a. Number of cases infected by COVID-19           | <input type="radio"/> | <input type="radio"/>   |
| b. Number of deaths infected by COVID-19          | <input type="radio"/> | <input type="radio"/>   |
| c. Number of recovered cases infected by COVID-19 | <input type="radio"/> | <input type="radio"/>   |

4. How do you mainly obtain health information?

- Internet
- Television
- Radio
- Newspaper
- Family members
- Other, please specify \_\_\_\_\_

5. How confident are you in your own hospital to diagnose or recognize COVID-19?

- Very confident
- Somewhat confident
- Not very confident
- Not at all confident
- Don't know

| 6. Please rate your likelihood of ...               | Very likely           | Somewhat likely       | Not very likely       | Not likely at all     | Don't know            |
|-----------------------------------------------------|-----------------------|-----------------------|-----------------------|-----------------------|-----------------------|
| a. Contracting COVID-19 during the current outbreak | <input type="radio"/> | <input type="radio"/> | <input type="radio"/> | <input type="radio"/> | <input type="radio"/> |
| b. Surviving COVID-19 if infected                   | <input type="radio"/> | <input type="radio"/> | <input type="radio"/> | <input type="radio"/> | <input type="radio"/> |

7. Please rate your concerns about other family members getting COVID-19.

- Don't have family member
- Very worried
- Somewhat worried
- Not very worried
- Not worried at all
- Don't know

8. Do you feel that you are being discriminated by other countries due to the outbreak of COVID-19?

- Yes
- No

Don't know

9. Did you buy masks during the outbreak of COVID-19?

Yes

No

No answer

10. When you bought a mask, was there something inconvenient.

please specify \_\_\_\_\_

### Part E: Pre-cautionary measures in past 14 days

| Do you do the following in the past 14 days...                        | most of the           |                       |                       |                       |                       |
|-----------------------------------------------------------------------|-----------------------|-----------------------|-----------------------|-----------------------|-----------------------|
|                                                                       | Always                | time                  | sometime              | occasional            | Never                 |
| 1. Covering mouth when coughing and sneezing                          | <input type="radio"/> | <input type="radio"/> | <input type="radio"/> | <input type="radio"/> | <input type="radio"/> |
| 2. Avoid sharing utensils                                             | <input type="radio"/> | <input type="radio"/> | <input type="radio"/> | <input type="radio"/> | <input type="radio"/> |
| 3. Washing hands with soap and water                                  | <input type="radio"/> | <input type="radio"/> | <input type="radio"/> | <input type="radio"/> | <input type="radio"/> |
| 4. Washing hands immediately after coughing, rubbing nose or sneezing | <input type="radio"/> | <input type="radio"/> | <input type="radio"/> | <input type="radio"/> | <input type="radio"/> |
| 5. Wearing mask regardless the presence or absence of symptoms        | <input type="radio"/> | <input type="radio"/> | <input type="radio"/> | <input type="radio"/> | <input type="radio"/> |
| 6. Washing hands after touching contaminated objects                  | <input type="radio"/> | <input type="radio"/> | <input type="radio"/> | <input type="radio"/> | <input type="radio"/> |
| 7. Avoiding elevators                                                 | <input type="radio"/> | <input type="radio"/> | <input type="radio"/> | <input type="radio"/> | <input type="radio"/> |
| 8. Sitting in one row while having a meal                             | <input type="radio"/> | <input type="radio"/> | <input type="radio"/> | <input type="radio"/> | <input type="radio"/> |
| 9. Avoiding meeting more than 10 people                               | <input type="radio"/> | <input type="radio"/> | <input type="radio"/> | <input type="radio"/> | <input type="radio"/> |

10. Do you feel that worry or anxiety has been made about COVID-19?

Always

Most of the time

Sometime

Occasional

Never

11. How many extra hours per day do you stay at home to avoid COVID-19?

\_\_\_\_\_ Hours

### Part F Additional information about COVID-19

1. Would you like to receive additional information about COVID-19?

- Yes
- No (Skip to PHQ-9)

2. I would like to receive additional information about COVID-19 on ...
- |                                                                                                        | Yes                   | No                    |
|--------------------------------------------------------------------------------------------------------|-----------------------|-----------------------|
| a. Details on symptoms                                                                                 | <input type="radio"/> | <input type="radio"/> |
| b. Advice on prevention                                                                                | <input type="radio"/> | <input type="radio"/> |
| c. Advice on treatment                                                                                 | <input type="radio"/> | <input type="radio"/> |
| d. Regular updates for latest information                                                              | <input type="radio"/> | <input type="radio"/> |
| e. Regular updates for the Outbreaks                                                                   | <input type="radio"/> | <input type="radio"/> |
| f. Advice for people who might need more tailored information, such as those with pre-existing illness | <input type="radio"/> | <input type="radio"/> |
| g. Availability and effectiveness of medicine/vaccine                                                  | <input type="radio"/> | <input type="radio"/> |
| h. How many people are affected/where it is affected                                                   | <input type="radio"/> | <input type="radio"/> |
| i. Travel advice                                                                                       | <input type="radio"/> | <input type="radio"/> |
| j. How COVID-19 is spread                                                                              | <input type="radio"/> | <input type="radio"/> |
| k. What other countries are doing                                                                      | <input type="radio"/> | <input type="radio"/> |
| l. The treatment and test cost of COVID-19                                                             | <input type="radio"/> | <input type="radio"/> |
| m. The school precautions                                                                              | <input type="radio"/> | <input type="radio"/> |

3. Please specify other information you would like to receive about COVID-19

\_\_\_\_\_

**Part 2: PHQ-9**

How often have they been bothered by the following over the past 2 weeks?

| Question                                                                          | Not at all | Several days | More than half the days | Almost every day |
|-----------------------------------------------------------------------------------|------------|--------------|-------------------------|------------------|
| I seemed have no interest or pleasure in doing work or leisure activities.        | 0          | 1            | 2                       | 3                |
| I felt depressed and hopeless.                                                    | 0          | 1            | 2                       | 3                |
| I found it difficult to fall asleep or keep sleeping, or slept too much suddenly. | 0          | 1            | 2                       | 3                |
| I felt tired or had little energy.                                                | 0          | 1            | 2                       | 3                |

|                                                                                                                                               |   |   |   |   |
|-----------------------------------------------------------------------------------------------------------------------------------------------|---|---|---|---|
| I tended to have no appetite or overeat.                                                                                                      | 0 | 1 | 2 | 3 |
| I felt that I have no confidence. Or I felt like I am a failure and let myself or my family down.                                             | 0 | 1 | 2 | 3 |
| It was difficult to concentrate on such things as reading newspapers or watching television.                                                  | 0 | 1 | 2 | 3 |
| When someone was watching me, I felt like moving or talking slowly. On the contrary, It was more active than usual, too restless or impetuous | 0 | 1 | 2 | 3 |
| I thought that it is better to die or that I would harm myself anyway                                                                         | 0 | 1 | 2 | 3 |

Note: New PHQ-9 was included in the survey from 2017 in the community health survey.

0-4 points: no or minimal depression / 5-9 points: mild depression

10-14 or higher: depression present / 15-19: severe degree of depression / 20 or higher: depression is very severe

**\*In this study, depression is judged by prior research and clinical criteria and community health survey depression criteria if 10 or more points or higher.**
